# Supplementary material for: Fluid Redox Fingerprint of the CaCO3+Antigorite Dehydration Reaction in Subducted Metacarbonate Sediments
Source: MDPI journal article supplement (doi:10.3390/geosciences13050130), 2023-04-30
Supplement: s1 [file s1]

# Supplementary Material: Fluid Redox Fingerprint of the $\text{CaCO}_3$ +Antigorite Dehydration Reaction in Subducted Metacarbonate Sediments

Andrea Maffei<sup>\*1</sup>, Simona Ferrando<sup>\*1</sup>, James Alexander Denis Connolly<sup>2</sup>, Maria Luce Frezzotti<sup>3</sup>, Daniele Castelli<sup>1</sup>

<sup>1</sup> Dipartimento di Scienze della Terra, Università di 10126 Torino, Italy;  
<sup>2</sup> Institute for Geochemistry and Petrology, Department of Earth Sciences, , ETH Zurich, CH 8092 Zurich, Switzerland;  
<sup>3</sup> Dipartimento di Scienze dell'Ambiente e della Terra, Università degli Studi di Milano-Bicocca, 20126 Milano, Italy;  
<sup>\*</sup> Correspondence: [andrea.maffei@unito.it](mailto:andrea.maffei@unito.it) (A.M.); [simona.ferrando@unito.it](mailto:simona.ferrando@unito.it) (S.F.)

*Table S1 Polynomial equations, and T(K) applicability boundaries, used to model the prograde BIU P-T path in phase diagram calculations. Multiple equations are required to reproduce the complex shape of the BIU P-T path*

|            | T(K)<br>MIN | T(K)<br>MAX | P -T PATH POLYNOMIAL EQUATIONS                                                                                                         |
|------------|-------------|-------------|----------------------------------------------------------------------------------------------------------------------------------------|
| 1° SEGMENT | 785         | 802         | $P \text{ (bar)} = -11623430.4685661 + 45373.8600314168 \times T(K) - 59.0614453375069 \times T(K)^2 + 0.025671244010 \times T(K)^3$   |
| 2° SEGMENT | 802         | 835         | $P \text{ (bar)} = 129829108.681766 - 475218.325922058 \times T(K) + 579.495527018783 \times T(K)^2 - 0.235373837137392 \times T(K)^3$ |

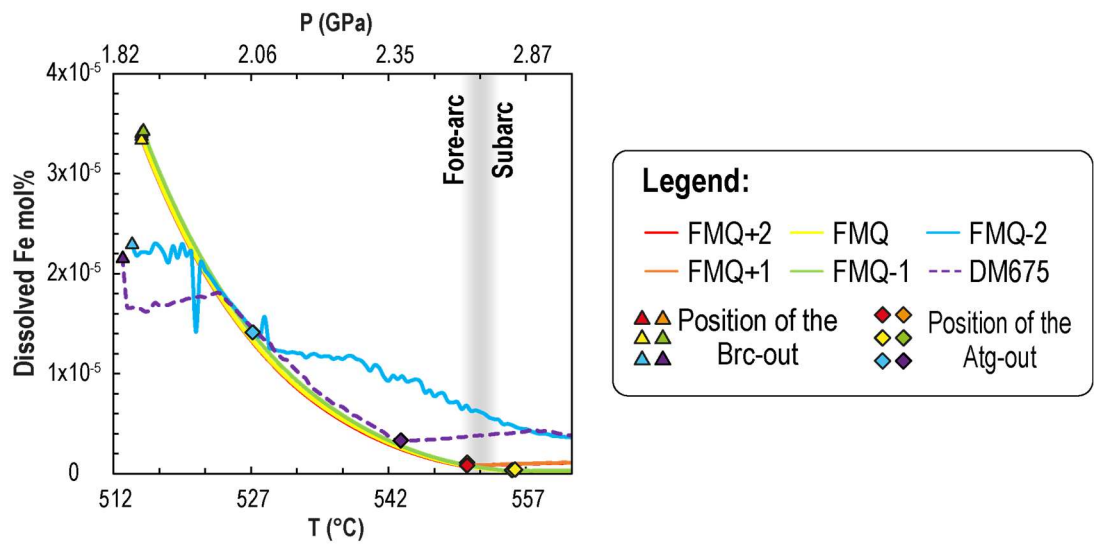

*Figure S1 Dissolved Fe in the fluid phase as a function of T, P and  $f\text{O}_2$*

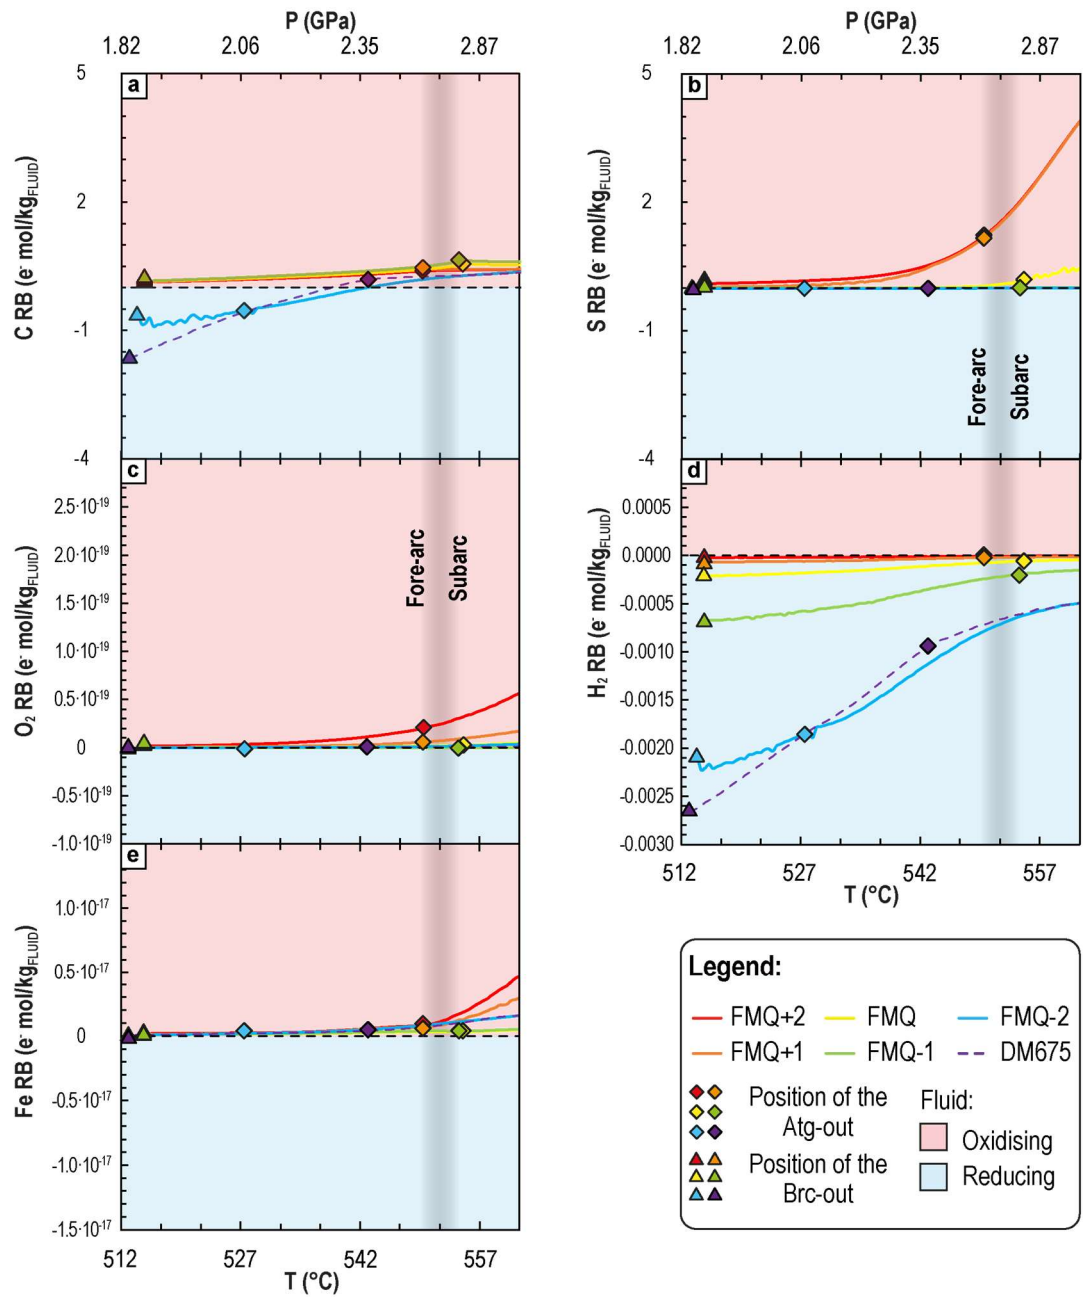

Figure S2 Calculated specific redox budgets for C, S, O<sub>2</sub>, H<sub>2</sub> and Fe as a function of T, P and  $fO_2$
